1 **Roosting ecology and the evolution of bat landing maneuvers**

2

3 David B. Boerma<sup>1,\*</sup> and Sharon M. Swartz<sup>1,2</sup>

4

5 <sup>1</sup>Department of Ecology and Evolutionary Biology, Brown University, Providence, RI 02906, USA;

6 <sup>2</sup>School of Engineering, Brown University, Providence, RI 02906, USA

7

8 \*Author for correspondence (boermadavid@gmail.com)

9

10 **Abstract**

11 Biomechanics is poised at the intersection of organismal form, function, and ecology, and forms a  
12 practical lens through which to investigate evolutionary linkages among these factors. We  
13 conducted the first evolutionary analysis of bat flight dynamics by examining the phylogenetic  
14 patterning of landing mechanics. We discovered that bats perform stereotyped maneuvers that are  
15 correlated with landing performance quantified as impact force, and that these are linked with  
16 roosting ecology, a critical aspect of bat biology. Our findings suggest that bat ancestors performed  
17 simple, four-limbed landings, similar to those performed by gliding mammals, and that more  
18 complex landings evolved in association with novel roost types. This explicit connection between  
19 ecology and biomechanics presents the opportunity to identify traits that are associated with a  
20 locomotor behavior of known ecological relevance, thus laying the foundation for a broader  
21 understanding of the evolution of flight and wing architecture in this extraordinarily successful  
22 mammalian lineage.

23

24 **Introduction**

25 Morphologists and biomechanicians often study organismal evolution as a function of  
26 three interrelated factors: structure (morphology), function (mechanics or behavior), and context  
27 (ecology). Detecting linkages among traits from these categories and discerning where trait shifts  
28 correspond with patterns of diversification not only provides evidence of selection but can also  
29 point to specific drivers of adaptive radiations, which are a central phenomenon in evolution  
30 (Arbour et al., 2019; Burrell and Wainwright, 2019; Dakin et al., 2018; Eliason et al., 2020;

31 Muñoz et al., 2018; Stroud and Losos, 2016). Within this framework, many investigations focus  
32 on pairwise relationships between two of the three factors: the discipline of functional morphology  
33 relates structure to function, whereas the discipline of ecomorphology relates structure with  
34 environmental context. These fields reveal both the variety of forms that evolution has produced  
35 and the details of how those forms work. Ultimately, however, each field omits the relationship  
36 that can be most informative for understanding the *process* of evolution alongside its products: the  
37 relationship between biomechanical function and ecological context. If “organismal performance  
38 is the primary substrate upon which selection acts, and variation in performance often arises from  
39 variation in biomechanics” (Higham et al., 2016), then directly probing the relationship between  
40 biomechanical diversity and ecological diversity can point to specific traits that could be targets of  
41 selection, and produce testable hypotheses about how form, function, and ecology interact to drive  
42 diversification.

43         Coordinated shifts in form, function, and context are necessary for the evolution of new  
44 locomotor modes, such as flight in the lineages that gave rise to bats, birds, insects, and pterosaurs.  
45 Although often overlooked, the evolution of flight required not only the evolution of flight *per se*,  
46 but also the evolution of landing maneuvers, which transition an animal from moving in air to a  
47 standstill; one need only refer to the Greek myth of Daedalus and Icarus to learn that the capacity  
48 for flight without the ability to safely land is untenable. For bats and most other flying animals,  
49 landing maneuvers also provide access to the structures that constitute their homes, such as roosts,  
50 nests, mounds, and hives. They rely on these structures to provide critical functions that extend  
51 beyond simply serving as refugia from weather and predators. For example, roost location  
52 determines the foraging grounds of many bat species; roosts serve as social spaces that facilitate  
53 access to mates, maternal care, and meal sharing; and divergent roost preferences can drive niche  
54 partitioning to permit co-occurrence of closely related species (Herrera et al., 2018; Kunz and  
55 Lumsden, 2003; Voss et al., 2016; Wilkinson, 1984). Furthermore, roost types vary among bat  
56 species and comprise a wide range of natural and human-made structures. These include bare  
57 expanses of cave ceiling, crevices and clefts in rock walls, cavities in trees, the voids beneath  
58 exfoliating tree bark, within the culms of bamboo, inside the funnels of furled leaves, and even  
59 within pitcher plants (see (Kunz and Fenton, 2006) and (Altringham, 2011) for review). Roosting  
60 ecology therefore plays an outsized role in defining the environmental mosaic in which bats survive

61 and evolve. Roosting, along with other aspects of bat ecology, such as diet, foraging style, sensory  
62 modalities, etc., shapes the behavioral and environmental context that drives changes in form,  
63 function, performance, and ultimately diversity (Higham et al., 2016; Schluter, 2009).

64 Despite the importance of roosting ecology to extant bat diversity, we know little about  
65 mechanistic factors that drive roost choices. Measures of biomechanical performance can yield  
66 insight into microhabitat preferences (Moore et al., 2017), and for bats, the mechanics of landing  
67 maneuvers may be linked to the physical properties of roosts. Specifically, landing dynamics may  
68 facilitate access to particular roost types for some species and reduce access for others. Bat landing  
69 maneuvers serve two basic functions: 1) body reorientation, and 2) velocity reduction. Body  
70 reorientation positions the claws of the foot and/or thumbs to attach to the roost and transitions  
71 the bat from a head-forward posture, with the vertebral column approximately parallel to the  
72 ground, to the characteristic head-under-heels roosting posture of most species. Velocity reduction  
73 modulates the bat's impact force with the roost and transitions its body from flight, with the center  
74 of mass at a non-zero forward velocity, to roosting with the center of mass at rest.

75 To date, research has identified three landing maneuvers among four species, which are  
76 named according to the number of points of contact the bat uses to attach to its landing site upon  
77 contact. These maneuvers include two-point landing (both hindlimbs only), and two variants of a  
78 four-point landing (both thumbs plus both hindlimbs) (Boerma et al., 2019; Riskin et al., 2009)  
79 (Supplemental Videos 1 – 4). Each landing style also involves a characteristic sequence of body  
80 rotations, and results in either relatively high or low impact forces normalized to bodyweight. Four-  
81 point landings are rotationally simple, primarily involving body pitch, and result in higher impact  
82 forces ( $>3$  bodyweights), whereas two-point landings are the most rotationally complex, and result  
83 in low peak impact forces ( $\leq 1$  bodyweight) (Boerma et al., 2019; Riskin et al., 2009). These studies  
84 have suggested that landing maneuvers and roosting habits are mechanically linked such that high-  
85 impact landings (four-point) are associated with roosting on compliant foliage or vertical surfaces,  
86 whereas low-impact landings (two-point) are associated with roosting on stiff horizontal surfaces,  
87 such as cave ceilings or tree hollows.

88 The broad biological importance of roosting ecology and interspecific variation in landing  
89 mechanics offers an opportunity to discover how the biomechanical basis of landing performance  
90 may underlie how bats take refuge and disperse within their environment. In the present study, we

91 ask three questions relating to landing mechanics, roosting habits, and the potential associations  
92 between them: 1) Do previously documented relationships between landing style and impact force  
93 remain consistent across a more diverse sample of bats, 2) what is the evolutionary history of bat  
94 landing maneuvers, and 3) is landing style linked to roosting ecology? We hypothesized that (i)  
95 rotationally complex landing maneuvers would result in lower impact forces than rotationally  
96 simple landing maneuvers, across species and body sizes; (ii) rotationally simple, four-point  
97 landings are the ancestral condition for bats from which any other style must have evolved; and  
98 (iii) landing styles are associated with the physical properties of the roosts to which they provide  
99 access. With respect to this final hypothesis, we predicted that four-point landings would be  
100 associated with compliant roosts, such as those constructed from foliage, because they could  
101 absorb the high impact forces generated by this landing style and because multiple points of  
102 contact enhance stability when landing on unstable targets (Boerma et al., 2019; Bonser, 1999;  
103 Demes et al., 1995; Riskin et al., 2009). We also predicted that stiff roosts, such as cave ceilings or  
104 tree cavities, would be associated with two-point landings because low impact forces could enhance  
105 the control and precision of landings and reduce risk of injury when a flying bat decelerates rapidly  
106 to attach to a stiff surface.

107

## 108 **Results**

### 109 *Landing styles across species*

110 We recorded 665 landings from 35 bat species, representing nine families. Of these, 15  
111 species performed two-point landings, 5 performed three-point landings, and 15 performed four-  
112 point landings, including *Thyroptera tricolor*, which performed a specialized four-point landing  
113 maneuver; see below and Boerma et al., 2019) (Table 1, Supplemental Videos 1 – 4). Overall,  
114 landing style was consistent within and among individuals of each species. Notable exceptions  
115 include *Artibeus jamaicensis*, which performed two- (29%) and three-point (71%) landings, and  
116 *Miniopterus schreibersii*, which performed two- (18%), three- (36%), and four-point (45%) landings.  
117 Pteropodid, vespertilionid, and mormoopid species performed four-point landings; emballonurid,  
118 rhinolophid and hipposiderid species performed two-point landings; and phyllostomids performed  
119 two-, three-, and four-point landings.

120

121 **Table 1: Study taxa, landing style observed, peak landing impact forces, and roosting ecology category.** Roost categories are: cavity in standing tree (CST), exposed  
 122 on standing tree (EST), unmodified foliage (FOL-UF), furled leaf-tubed (FOL-TB), foliage modified into leaf-tents (FOL-LT), termite or ant nests (TAN), rocks  
 123 and/or caves (R/C), and rock crevices (CREV). Bolded categories indicate those used for comparative analyses; see text for further explanation. \*Data from Riskin  
 124 et al. (2009). †*H. pratti* performed landings that were qualitatively similar to two-point landings, however, following attachment with the hindlimbs, bats flexed the  
 125 spine ventrally and extended the shoulder and elbow joints to lift the thumb claws ventrally toward their attachment site on the landing plate. Because the thumbs  
 126 were attached only after the contact during landing, we classify landings by *H. pratti* as two-point in our analysis. ‡*T. tricolor* performs a specialized four-point landing  
 127 maneuver (see Boerma et al., 2019). See Figure 1–Source Data 1 for raw data used to generate this table.

128  
129

| Taxon                            | N (total observed landings, individuals) | N (Force recordings, individuals) | Landing Style        | Peak $F_{tot}$ (Bodyweight BW) (mean±s.d) | Roosting Ecology | Source(s)                                                                                      |
|----------------------------------|------------------------------------------|-----------------------------------|----------------------|-------------------------------------------|------------------|------------------------------------------------------------------------------------------------|
| <b><u>Yinterpochiroptera</u></b> |                                          |                                   |                      |                                           |                  |                                                                                                |
| Pteropodidae                     |                                          |                                   |                      |                                           |                  |                                                                                                |
| <i>Cynocephalus brachyotis</i> * | 30, 3                                    | 30, 3                             | 4-point              | 3.83±1.23                                 | FOL-UF, FOL-LT   | (Campbell et al., 2006; Funakoshi and Zubaid, 1997; Tan et al., 1997)                          |
| <i>Rousettus aegyptiacus</i>     | 57, 3                                    | -                                 | 4-point              | -                                         | R/C              | (Herzig-Straschil and Robinson, 1978; Kwiecinski and Griffiths, 1999; Thomas and Fenton, 1978) |
| Hipposideridae                   |                                          |                                   |                      |                                           |                  |                                                                                                |
| <i>Hipposideros pratti</i>       | 7, 1                                     | -                                 | 2-point <sup>†</sup> | -                                         | R/C              | (Niu et al., 2007; Zhang et al., 2009)                                                         |
| Rhinolophidae                    |                                          |                                   |                      |                                           |                  |                                                                                                |
| <i>Rhinolophus hipposideros</i>  | 33, 3                                    | 32, 3                             | 2-point              | 0.52±0.04                                 | R/C              | (Aulagnier et al., 2018)                                                                       |
| <i>Rhinolophus mehelyi</i>       | 30, 4                                    | 30, 4                             | 2-point              | 0.60±0.17                                 | R/C              | (Aulagnier et al., 2018)                                                                       |
| <i>Rhinolophus euryale</i>       | 22, 4                                    | 22, 4                             | 2-point              | 1.03±0.44                                 | R/C              | (Aulagnier et al., 2018)                                                                       |
| <i>Rhinolophus ferrumequinum</i> | 31, 4                                    | 31, 4                             | 2-point              | 1.29±1.00                                 | R/C              | (Aulagnier et al., 2018)                                                                       |
| <b><u>Yangochiroptera</u></b>    |                                          |                                   |                      |                                           |                  |                                                                                                |
| Emballonuridae                   |                                          |                                   |                      |                                           |                  |                                                                                                |
| <i>Rhynchonycteris naso</i>      | 6, 1                                     | -                                 | 2-point              | -                                         | EST, FOL-UF      | Sources cited by (Fenton et al., 2001; Voss et al., 2016)                                      |
| <i>Saccopteryx bilineata</i>     | 2, 1                                     | -                                 | 2-point              | -                                         | CST, EST         | Sources cited by (Voss et al., 2016)                                                           |
| Thyropteridae                    |                                          |                                   |                      |                                           |                  |                                                                                                |

|                                  |        |        |                      |           |                          |                                                                                   |
|----------------------------------|--------|--------|----------------------|-----------|--------------------------|-----------------------------------------------------------------------------------|
| <i>Thyoptera tricolor</i>        | 71, 16 | 44, 14 | 4-point <sup>‡</sup> | 6.98±1.89 | FOL-TB                   | (Wilson and Findley, 1977)                                                        |
| Mormoopidae                      |        |        |                      |           |                          |                                                                                   |
| <i>Pteronotus mesoamericanus</i> | 17, 2  | -      | 4-point              | -         | R/C, CST                 | Sources cited by (Voss et al., 2016)                                              |
| <i>Pteronotus davyi</i>          | 11, 2  | -      | 4-point              | -         | R/C                      | Sources cited by (Fenton et al., 2001)                                            |
| Phyllostomidae                   |        |        |                      |           |                          |                                                                                   |
| <i>Micronycteris schmidtorum</i> | 5, 1   | -      | 2-point              | -         | CST                      | Sources cited by (Voss et al., 2016)                                              |
| <i>Glossophaga soricina</i> *    | 49, 5  | 49, 5  | 2-point              | 0.63±0.11 | CST, R/C                 | Sources cited by (Voss et al., 2016)                                              |
| <i>Chrotopterus auritus</i>      | 3, 1   | -      | 2-point              | -         | -                        | -                                                                                 |
| <i>Mimon cozumelae</i>           | 20, 4  | 19, 4  | 2-point              | 1.22±0.29 | CST, R/C                 | Sources cited by (Fenton et al., 2001; Simmons and Voss, 1998; Voss et al., 2016) |
| <i>Lophostoma evotis</i>         | 9, 1   | -      | 3-point              | -         | TAN                      | (Fenton et al., 2001; Reid, 2009)                                                 |
| <i>Gardnerycteris crenulatum</i> | 3, 1   | -      | 2-point              | -         | CST                      | Sources cited by (Voss et al., 2016)                                              |
| <i>Carollia sowelli</i>          | 16, 3  | 16, 3  | 2-point              | 1.98±0.41 | CST, R/C                 | (Fenton et al., 2001); Sources cited by (Voss et al., 2016)                       |
| <i>Carollia perspicillata</i> *  | 50, 5  | 50, 5  | 2-point              | 0.76±0.15 | CST, CFT, R/C            | (Cloutier and Thomas, 1992; Fenton et al., 2001; Reid, 2009; Voss et al., 2016)   |
| <i>Sturnira parvidens</i>        | 23, 5  | 11, 3  | 4-point              | 4.22±2.29 | FOL-UF, CST              | (Fenton et al., 2001, 2000)                                                       |
| <i>Uroderma bilobatum</i>        | 2, 1   | 2, 1   | 3-point              | 3.95      | FOL-LT                   | (Barbour, 1932; Timm, 1985)                                                       |
| <i>Dermanura phaeotis</i>        | 25, 5  | 10, 3  | 3-point              | 2.73±2.32 | FOL-LT                   | (Timm, 1985)                                                                      |
| <i>Artibeus jamaicensis</i>      | 21, 3  | 21, 3  | 2-, 3-point          | 1.19±0.30 | R/C, FOL-LT              | Sources cited (Timm, 1985)                                                        |
| <i>Artibeus intermedius</i>      | 11, 2  | 11, 2  | 2-point              | 1.03±0.24 | R/C, CST, FOL-UF, FOL-LT | (Reid, 2009)                                                                      |
| <i>Artibeus watsoni</i>          | 5, 1   | -      | 3-point              | -         | FOL-LT                   | (Chapman, 1932; Chaverri and Kunz, 2006; Choe and Timm, 1985)                     |
| Minopteridae                     |        |        |                      |           |                          |                                                                                   |
| <i>Minopterus schreibersii</i>   | 30, 3  | 11, 2  | 2-, 3-, 4-point      | -         | R/C, CREV                | (Aulagnier et al., 2018; Nowak, 1999)                                             |
| Vespertilionidae                 |        |        |                      |           |                          |                                                                                   |

|                            |                |                |         |      |                              |                                                                                              |
|----------------------------|----------------|----------------|---------|------|------------------------------|----------------------------------------------------------------------------------------------|
| <i>Myotis keaysi</i>       | 5, 1           | -              | 4-point | -    | R/C, <b>CREV</b> ,<br>CST    | (Brunet and Medellín, 2001;<br>Hernández-Meza et al., 2005;<br>Jr. et al., 1973; Reid, 2009) |
| <i>Myotis daubentonii</i>  | 10, 1          | -              | 4-point | -    | <b>CREV</b> , R/C            | (Aulagnier et al., 2018;<br>Bogdanowicz, 1994)                                               |
| <i>Myotis myotis</i>       | 12, 2          | -              | 4-point | -    | R/C, <b>CREV</b>             | (Aulagnier et al., 2018)                                                                     |
| <i>Myotis capaccinii</i>   | 16, 4          | 4, 1           | 4-point | 4.26 | R/C, <b>CREV</b>             | (Aulagnier et al., 2018;<br>Papadatou et al., 2008)                                          |
| <i>Rhogeessa aeneus</i>    | 3, 1           | -              | 4-point | -    | CST, <b>CREV</b> ,<br>FOL-UF | (Nowak, 1999; Reid, 2009)                                                                    |
| <i>Eptesicus fuscus</i>    | 10, 1          | 9, 1           | 4-point | 5.46 | <b>CREV</b> , CST            | (Brigham, 1991; Lausen and<br>Barclay, 2003, 2002)                                           |
| <i>Eptesicus serotinus</i> | 10, 1          | -              | 4-point | -    | <b>CREV</b> , R/C            | (Aulagnier et al., 2018; Catto<br>et al., 1995)                                              |
| <i>Hypsugo savii</i>       | 10, 1          | -              | 4-point | -    | <b>CREV</b> , R/C            | (Aulagnier et al., 2018;<br>Horáček and Benda, 2004)                                         |
| <b>Totals:</b>             | <b>665, 96</b> | <b>401, 65</b> |         |      |                              |                                                                                              |

131

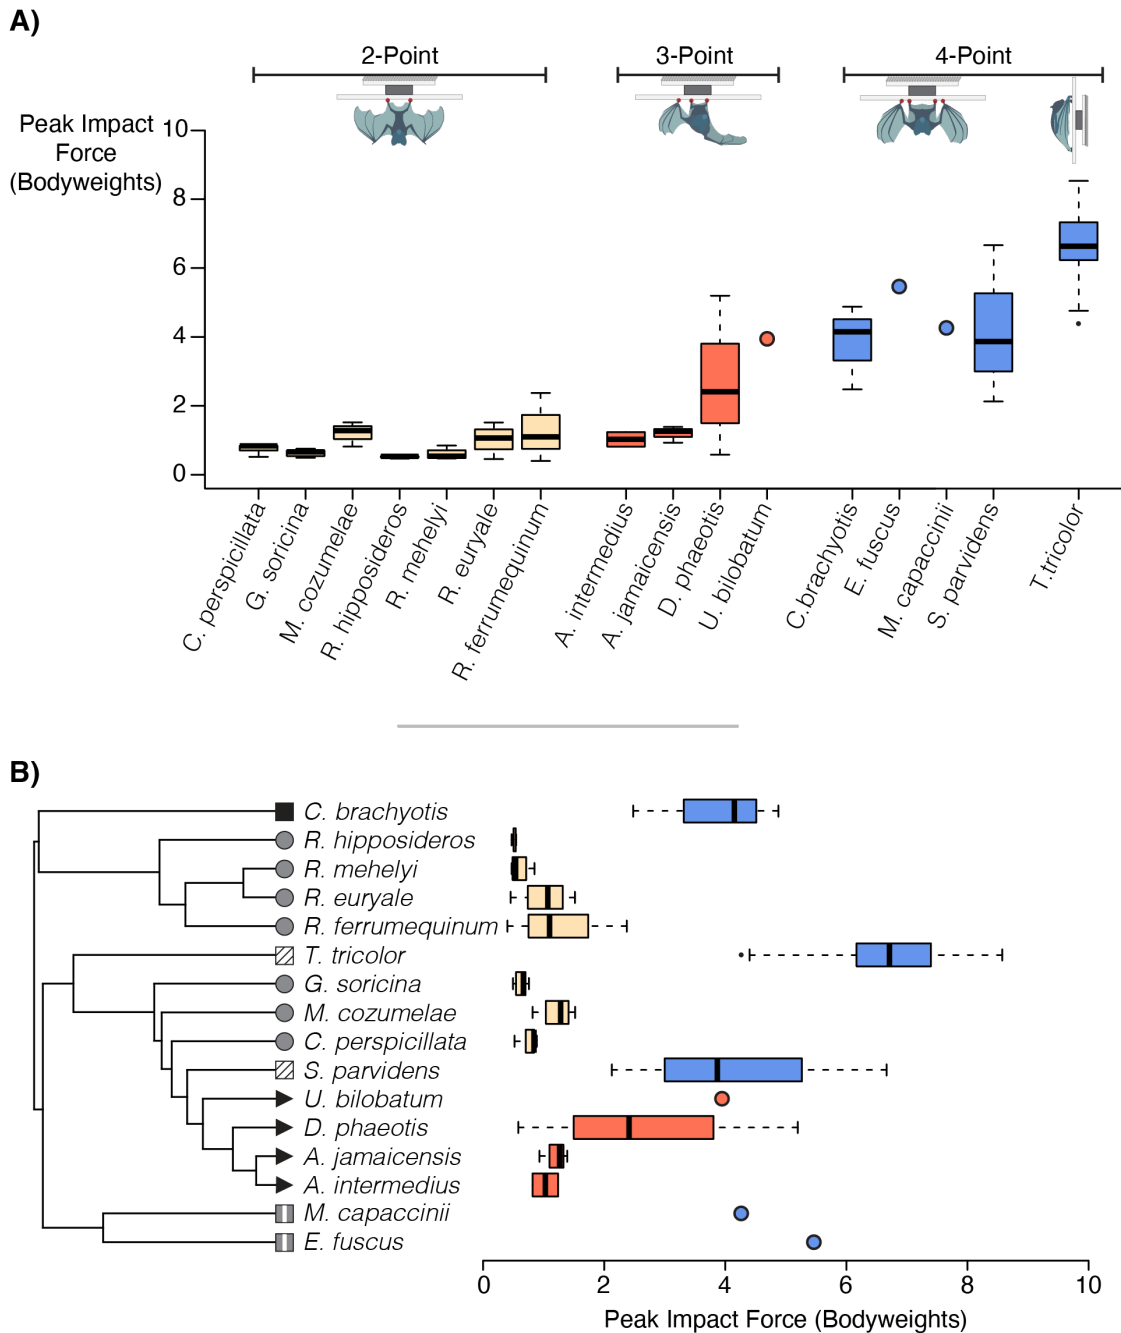

**Figure 1: Peak landing impact forces** (excluding *M. schreibersii*; see table 1 for sample sizes). Box and whisker plots show the median and interquartile range. (A) Landing impact forces arranged by landing style. (B) Landing impact forces arranged phylogenetically (tree adapted from Shi and Rabosky, 2015). Two-point landings are denoted by yellow boxes and circle icons at branch tips, three-point landings by red boxes and triangle icons, and four-point landings by blue boxes and square icons. Icon fill color represents roosting ecology: solid gray = stiff horizontal roosts; grey with vertical white stripe = crevices; black = leaf tents; and hatched = unmodified foliage. Legend also provided in figure 2. See Figure 1–Source Data 1 for raw impact force measurements for each landing and Figure 1–Source Data 2 for each individual’s mean peak impact force, the latter of which was used to generate these figures. See Source Code File 1 for R code to reproduce these plots.



132 *Landing impact force increases with points of contact across landing styles*

133 Two-point landings from 32 individuals of 15 species, from 4 families, uniformly resulted  
134 in low peak impact forces, with a mean of  $0.95 \pm 0.54$  BW (mean  $\pm$  s.d.). Four-point landings  
135 resulted in higher impact forces:  $3.72 \pm 1.71$  BW (n=10 individuals, 5 species). Three-point  
136 landings were intermediate in magnitude and more variable; mean impact was  $1.71 \pm 1.44$  BW  
137 (n=12 individuals, 4 species). The specialized four-point landings of *T. tricolor* resulted in the  
138 highest impact forces,  $6.98 \pm 1.89$  BW (n=14 individuals) (Boerma et al., 2019). Phylogenetic  
139 generalized least squares regression (PGLS, *T. tricolor* omitted, see *Phylogenetic Analyses* in Methods)  
140 revealed that log peak impact force increases significantly with points of contact across species  
141 (DF=14, F=33.47,  $p=4.726 \times 10^{-5}$ ). Phylogenetic ANOVA (*T. tricolor* omitted) corroborated that  
142 landing style has a significant effect on log peak impact force (F=14.04,  $p=0.0099$ ). Pairwise  
143 posthoc tests with Holm-Bonferroni correction show that two-point landings result in significantly  
144 lower impact forces than four-point landings ( $t=-5.26$ ,  $p=0.0078$ ), and that the intermediate  
145 impact forces associated with three-point landings are not statistically different from either two-  
146 point ( $t=2.49$ ,  $p=0.2266$ ) or four-point landings ( $t=-2.45$ ,  $p=0.2266$ ) (see Source Code File 3 and  
147 PGLS phylANOVA–Source Data 1 for the raw data and code used to conduct these analyses).

148

149 *Four-point landings are ancestral and preceded multiple independent evolutions of two- and three- point*  
150 *landings*

151 We simulated 1000 stochastic character maps of landing style on a phylogeny pruned to  
152 our sampled taxa (figure 2). These simulations estimated that four-point landings were ancestral  
153 (Posterior Probability (PP) = 0.862), and that landing style shifted an average of 7.903 times. Of  
154 these shifts, 3.161 state changes occurred from four- to two-point landings. This was the most  
155 common evolutionary shift and occurred at multiple locations in the bat phylogeny. Additional  
156 state changes were concentrated among bats in the family Phyllostomidae. In this clade, 2.061  
157 shifts occurred from two- to three-point landings, and we detected 1.427 reversals from two- to  
158 four-point landings (in *S. parvidens*). Our reconstruction also estimated 0.636 state changes from  
159 three- to four-point landings, 0.384 state changes from four- to three-point landings, and 0.234  
160 state changes from three- to two-point landings. The mean proportion of time spent in each state

161 was 54.14% in four-point landings, 38.90% in two-point landings, and 7.06% in three-point  
 162 landings.

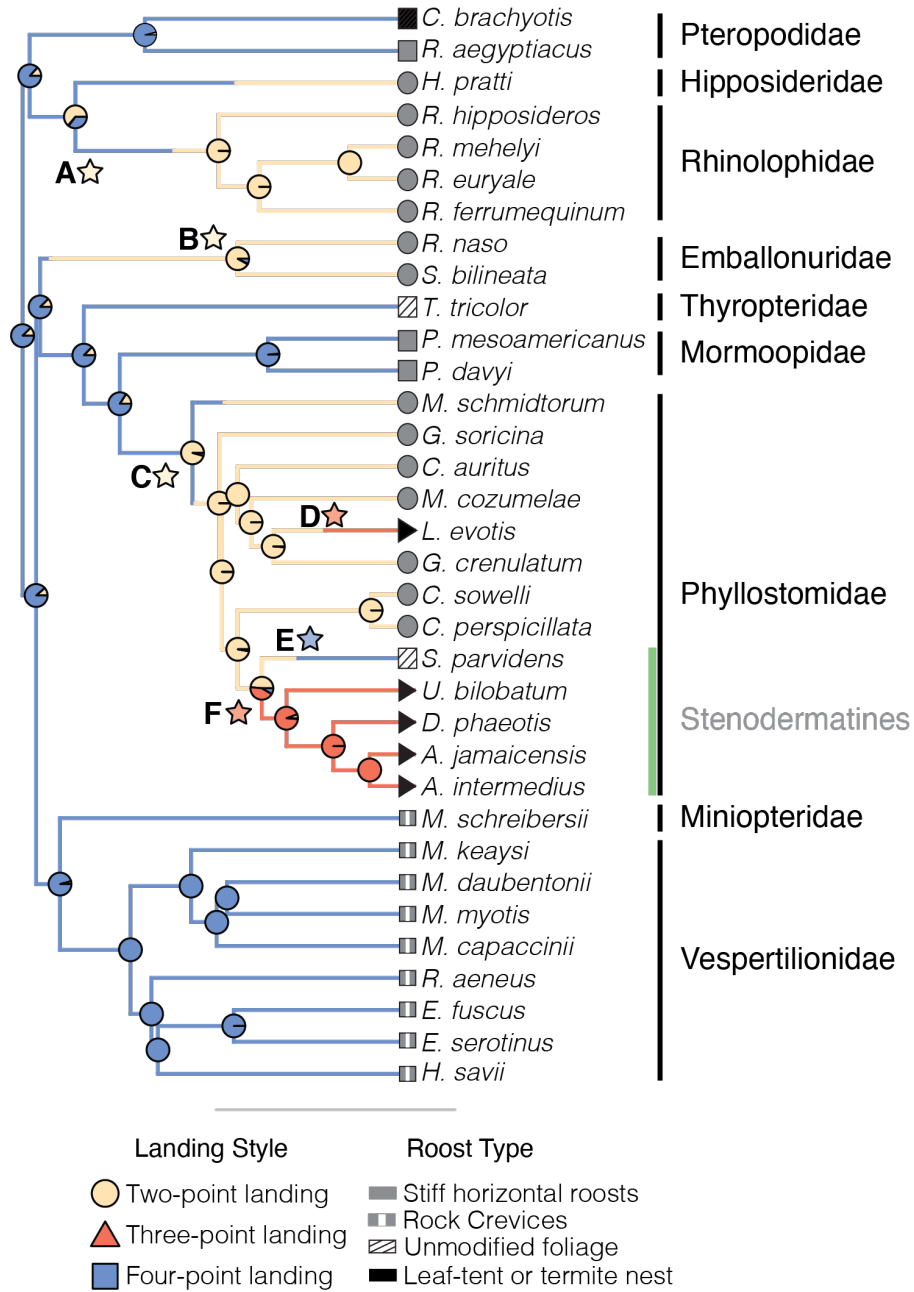

**Figure 2: Stochastic map of landing styles.** Pie charts at the nodes show posterior probabilities. Stars A-E mark shifts in landing style. Tip shapes denote landing style, and tip fill denotes the roost type used in the aggregated model of phylogenetic logistic regression. Black vertical bars to the right of the species names denote families; the green line highlights the subfamily Stenodermatinae. Phylogeny adapted from Shi and Rabosky (2015). See Figure 2–Source Data 1, Figure 2–Source Data 2, and Source Code File 2 for the raw data and code used to generate this figure. Full posterior probabilities are provided in Supplemental Files 1 and 2.

163

164           Among the taxa we sampled, we detected three independent shifts to from four- to two-  
165 point landings. These occurred at the base of the clade giving rise to the Rhinolophidae and  
166 Hipposideridae ( $PP_{\text{two-point}} = 0.642$ ), at the base of Emballonuridae ( $PP_{\text{two-point}} = 0.92$ ), and (iii) at the  
167 base of the Phyllostomidae ( $PP_{\text{two-point}} = 0.949$ ) (figure 2A, B, & C). Three-point landings evolved  
168 relatively recently, emerging first in the common ancestor of the phyllostomid subfamily  
169 Stenodermatinae (figure 2F). This ancestor possessed equal probability of performing two- or three-  
170 point landings ( $PP_{\text{two-point}} = 0.464$ ;  $PP_{\text{three-point}} = 0.463$ ) (figure 2F). In this species sample, the  
171 common ancestor of tent-roosting phyllostomids (stenodermatines excluding *S. parvidens*) was most  
172 likely to perform three-point landings ( $PP_{\text{three-point}} = 0.921$ ). Three-point landings also arose in the  
173 phyllostomid *L. evotis* (figure 2D). We detected one reversal from two- to four-point landings in the  
174 phyllostomid *S. parvidens* (figure 2E). Four-point landings, the ancestral condition, persisted in  
175 pteropodids, mormoopids, and vespertilionids, based on analysis of this sample.

176

177 *Landing styles are associated with the physical properties of roosts across species*

178 We investigated the relationship between roosting ecology and landing style by using phylogenetic  
179 logistic regression to compare landing style with roosting ecology using alternative roost  
180 classification schemes, which aggregated roost categories with similar physical characteristics (table  
181 2). Compared to the null model, our aggregated model had greater explanatory power for  
182 predicting landing style from roosting ecology, as indicated by AIC score. Our null model, which  
183 tested for association between roosting habits and landing style using the most common roost type  
184 for each species, revealed a significant positive association only between cavity-roosting and two-  
185 point landings ( $\beta_{\text{Null|CST-2pt}} = 3.862$ ;  $p_{\text{Null,CST-2pt}} = 0.01701$ ). Aggregating roosting categories according  
186 to physical properties, such as compliance, orientation, and spatial constraint, allowed us to test  
187 the hypothesis that these physical properties are significantly associated with the mechanics of the  
188 three known landing styles. We found that two-point landings were positively associated with stiff,  
189 horizontal roosts, such as caves and cavities ( $\beta_{\text{Agg,|CST+EST+R/C|-2pt}} = 4.367$ ;  $p_{\text{Agg,|CST+EST+R/C|-2pt}} =$   
190  $0.008089$ ). Three-point landings were positively associated with roosting in spatially constrained  
191 structures, such as leaf-tents and termite nests ( $\beta_{\text{Agg,|tent+tan|-3pt}} = 3.525$ ;  $p_{\text{Agg,|tent+tan|-3pt}} = 0.04354$ ). Four-  
192 point landings were negatively associated with roosting beneath stiff, horizontal structures  
193 ( $\beta_{\text{Agg,|CST+EST+R/C|-4pt}} = -2.144$ ;  $p_{\text{Agg,|CST+EST+R/C|-4pt}} = 0.03589$ ).

194 **Table 2: Correlations between landing style and roosting ecology from phylogenetic logistic regressions.** We provide Firth-corrected coefficient estimates ( $\beta$ ) with  
 195 bootstrapped 95% confidence intervals (in brackets) and Wald p-values (in italics) to denote significant associations between roost type. Significant p-values are  
 196 bolded and set within shaded cells. AIC scores provide comparison between our Null and Aggregated model (models with smaller AIC are preferred; differences are  
 197 meaningful when  $\geq 2$ ). P-values are conditional upon phylogenetic signal,  $\alpha$ , where values near 0 denote strong phylogenetic signal and values approaching 1  
 198 indicate weak phylogenetic signal. Roosting ecology categories correspond with those listed in Table 1: cavity in standing tree (CST), exposed on standing tree (EST),  
 199 rocks and/or caves (R/C), termite or ant nests (TAN), foliage-leaf tent (FOL-LT), unmodified foliage (FOL-UF), and rock crevices (CREV). See Table 2–Source Data  
 200 1 and Source Code File 3 for data and code used to produce this table.  
 201

| Model                  | Landing | CST                                                                    | EST                                  | R/C                                 | TAN                                              | FOL-LT                              | FOL-UF                               | CREV                                   | AIC   | $\alpha$ |
|------------------------|---------|------------------------------------------------------------------------|--------------------------------------|-------------------------------------|--------------------------------------------------|-------------------------------------|--------------------------------------|----------------------------------------|-------|----------|
|                        |         | $\beta$ = Mean coefficient estimate, [lower CI, upper CI], <i>pval</i> |                                      |                                     |                                                  |                                     |                                      |                                        |       |          |
| All Roost Types (Null) | 2-pt.   | 3.862<br>[0.637, 5.413]<br><b><i>0.01701</i></b>                       | 2.944<br>[-0.053, 3.700]<br>0.26658  | 1.978<br>[-1.225, 4.072]<br>0.12250 | 1.748<br>[-0.869, 3.164]<br>0.2981               | 0.594<br>[-2.345, 2.482]<br>0.68152 | 1.027<br>[-1.225, 2.655]<br>0.50338  | -1.277<br>[-2.737, 0.216]<br>0.30867   | 40.61 | 0.0036   |
|                        | 3-pt.   | -0.098<br>[-1.708, 2.136]<br>0.8973                                    | -0.135<br>[1.099, 1.408]<br>0.9097   | -0.975<br>[-2.402, 0.471]<br>0.2719 | 2.459<br>[-0.580, 3.340]<br>0.4405               | 1.608<br>[-0.524, 4.513]<br>0.3182  | 0.090<br>[-2.402, 0.471]<br>0.2719   | -0.453<br>[-1.243, 0.680]<br>0.7954    | 30.09 | 0.0030   |
|                        | 4-pt.   | -0.657<br>[-2.108, 0.557]<br>0.9017                                    | -0.237<br>[-1.627, -1.315]<br>0.8468 | -0.237<br>[-1.812, 1.878]<br>0.7521 | -0.234<br>[-1.535, 1.122]<br>0.8523              | -0.237<br>[-1.275, 1.063]<br>0.7938 | 1.081<br>[-0.995, 3.199]<br>0.5321   | 0.190<br>[-1.020, 1.090]<br>0.9017     | 42.35 | 0.0045   |
| Aggregated Model (Agg) | 2-pt.   | 4.367<br>[2.023, 5.428]<br><b><i>0.008089</i></b>                      |                                      |                                     | 1.648<br>[-0.851, 3.065]<br>0.366708             |                                     | 1.346<br>[-0.519, 3.345]<br>0.580319 | -2.947<br>[-3.023, -1.079]<br>0.366708 | 33.03 | 0.5251   |
|                        | 3-pt.   | -0.631<br>[-2.476, 1.681]<br>0.76677                                   |                                      |                                     | 3.525<br>[0.231, 5.184]<br><b><i>0.04354</i></b> |                                     | 1.356<br>[-0.532, 3.348]<br>0.57546  | -2.937<br>[-3.00, -0.248]<br>0.05402   | 20.28 | 0.9100   |
|                        | 4-pt.   | -2.144<br>[-4.498, -0.337]<br><b><i>0.03589</i></b>                    |                                      |                                     | -1.133<br>[-3.681, 1.890]<br>0.38111             |                                     | 1.308<br>[-2.236, 2.538]<br>0.56684  | 0.703<br>[-0.637, 2.950]<br>0.51964    | 32.33 | 0.0076   |

202  
203

204

## 205 Discussion

206 Using a combination of field and lab-based measurements, we investigated functional links  
207 between landing mechanics and roosting ecology, which is a critical biological factor for bats. Our  
208 measurements of landing style in 35 bat species and peak impact forces in a 17 species subset of  
209 this group shows that landing impact force increases with the number of points of contact a bat  
210 uses to land, i.e. impact force varies according to landing style even after correction for  
211 phylogenetic relationships among the study species. Moreover, we observe that bat landing styles  
212 are associated with patterns of roost use: rotationally simple, high-impact four-point landings are  
213 ancestral for bats, and rotationally complex two-point landings evolved independently multiple  
214 times in lineages that habitually roost beneath stiff surfaces. Furthermore, in the stenodermatines,  
215 a subfamily of the Phyllostomidae that shows a reversal from roosting in cavities (stiff surfaces) to  
216 roosting in foliage (compliant surfaces) (Garbino and Tavares, 2018), we observe a concomitant  
217 reversal from low-impact two-point landings to higher-impact three- and four-point landings.  
218 Three-point landings, which we describe for the first time in the present study, arose twice among  
219 our sampled taxa, each time in species that roost within spatially constrained horizontal roosts,  
220 such as leaf tents or evacuated termite nests.

221

### 222 *Roosting ecology and the evolution of bat landing maneuvers*

223 Four-point landings, the ancestral condition for bat landings, are performed by nearly half  
224 of the species in our sample (15 of 35). These landings were negatively associated with roosting  
225 beneath stiff, horizontal surfaces (e.g., tree cavities and cave ceilings), but are not strictly associated  
226 with compliant foliage roosts across the bat phylogeny, as has been hypothesized in earlier  
227 investigations (Riskin et al., 2009). This foliage-roost hypothesis is weakly supported in the  
228 phyllostomids we examined (e.g., *S. parvidens*) and for *T. tricolor*, both of which are foliage roosting  
229 species that employ four-point landings. However, our sampling of pteropodids, mormoopids, and  
230 vespertilionids, which included bats that habitually roost beneath stiff surfaces, such as cave  
231 ceilings, and those that land on vertical walls and roost within rock crevices (vespertilionids), did  
232 not show a clear correlation between four-point landing and foliage roosting. Broader sampling  
233 among pteropodids and mormoopids could reveal additional patterns of roost use and landing

234 mechanics. However, our results suggest that landing maneuvers in these three families are not as  
235 labile as in phyllostomids or rhinolophids. In the case of crevice-roosting bats, all of which are  
236 vespertilionids in this sample, four-point landings may offer functional opportunities despite the  
237 higher impact forces typically incurred on stiff substrates. These include facilitating more rapid  
238 access to interstices in the walls of cliffs, caves, trees, and human-made structures compared to  
239 other landing styles. Landing with four points of contact immediately places all limbs on the  
240 substrate, thus allowing for immediate transition from flight to landing to terrestrial locomotion  
241 (crawling) along the roost surface. This rapid locomotor transition could minimize the time  
242 required to locate crevice refuges (Supplementary Video 5, *M. myotis*) and reduce exposure to  
243 predators or adverse climatic conditions.

244 We observed convergent shifts from four-point to two-point landings at three nodes in the  
245 phylogeny (figure 2A, B, and C), each representing a common ancestor of a lineage characterized  
246 by roosting beneath stiff, horizontal roosts (table 2). These shifts support the hypothesis that  
247 rotationally complex, low-impact two-point landings evolved in association with the physical  
248 properties of roosts in these lineages. Further support for this hypothesis is found among the  
249 phyllostomids in particular, in which secondary reversals away from stiff horizontal roosts (e.g.,  
250 cavity or cave-roosting) to roosting in foliage or within spatially constrained structures on  
251 vegetation (e.g., leaf-tents and abandoned termite nests), corresponded with shifts from two-point  
252 to four- or three-point landings (figure 2D, E, and F). Apart from *L. evotis*, which roosts in termite  
253 nests, we documented high-impact three- and four-point landings only among bats in the  
254 phyllostomid subfamily Stenodermatinae (figure 2, taxa highlighted by the green vertical line), the  
255 lineage in which foliage roosting re-arose within Phyllostomidae (Garbino and Tavares, 2018). If  
256 bat landing maneuvers are adapted to the physical properties of roosts, this transition from low-  
257 impact to high-impact landings at the node with a corresponding shift from stiff to compliant  
258 roosts could signal relaxed selective pressure for low-impact landings.

259 The stenodermatines are a relatively recent radiation (Amador et al., 2018; Rojas et al.,  
260 2016; Shi and Rabosky, 2015), and they show diversification rates that are approximately twice as  
261 high those background rates for Chiroptera (Dumont et al., 2012; Shi and Rabosky, 2015).  
262 Previous work has identified shifts in diet, sensory modalities, and associated cranial morphology  
263 as key innovations that led to this rapid diversification (Arbour et al., 2019; Dumont et al., 2014,

264 2012; Santana et al., 2012), but some have speculated that shifts toward foliage roosting may have  
265 also contributed to increased speciation rates in this clade (Garbino and Tavares, 2018; Voss et al.,  
266 2016). Here, we document transitions in this lineage from two-point to three- and four-point  
267 landings, and thus hypothesize that these evolutionary shifts in landing mechanics could be  
268 included among the factors contributing to the recent evolutionary success of the stenodermatines.  
269

#### 270 *Many-to-one mapping of high-impact landings*

271 The hypothesis that convergence in roosting habits is associated with convergence of  
272 landing style across the bat phylogeny is implicit in our prediction that roosting ecology and  
273 landing style are linked. Our findings largely supported this hypothesis, but one intriguing  
274 example of where results diverged from this pattern is in lineages that convergently evolved a  
275 highly derived roosting ecology – tent-making. Tent-making refers to a behavior in which bats  
276 weaken the veins of large leaves by biting them so that portions of the leaf droop to create a tent-  
277 like shelter (Barbour, 1932; Kunz and Fenton, 2006; Kunz and Lumsden, 2003; Tan et al., 1997;  
278 Timm, 1987). Leaf tents can take multiple forms (see Kunz and Lumsden 2003 for review), but  
279 seem to function primarily as refugia from climate, rather than from predators (Tan et al., 1997).  
280 This behavior independently arose in at least three species in the family Pteropodidae (represented  
281 by *C. brachyotis* in our sample), and several species in the family Phyllostomidae (subfamily  
282 Stenodermatinae, figure 2) (Kunz and Lumsden, 2003). Among the species in our study that  
283 convergently evolved this derived roosting ecology, we observed family-level differences in landing  
284 maneuvers, including the number of points of contact (three vs. four) and limb contact order  
285 (hindlimbs first in three-point landings vs. thumbs first in four-point landings). Despite these  
286 differences, however, three-point and four-point landings share similar degrees of rotational  
287 complexity and result in similarly high impact forces (Figure 1).

288 This observation suggests a many-to-one mapping of landing mechanics to landing impact  
289 force for species that roost in leaf tents; that is, although three- and four-point landings differ  
290 kinematically, they result in a similar functional outcome (high impact forces), and their  
291 differences may be due simply to the different evolutionary starting points of extant pteropodids  
292 and stenodermatines (Wainwright et al., 2005). The most recent common ancestor of  
293 stenodermatines and other phyllostomids in our sample most likely roosted in cavities (Garbino

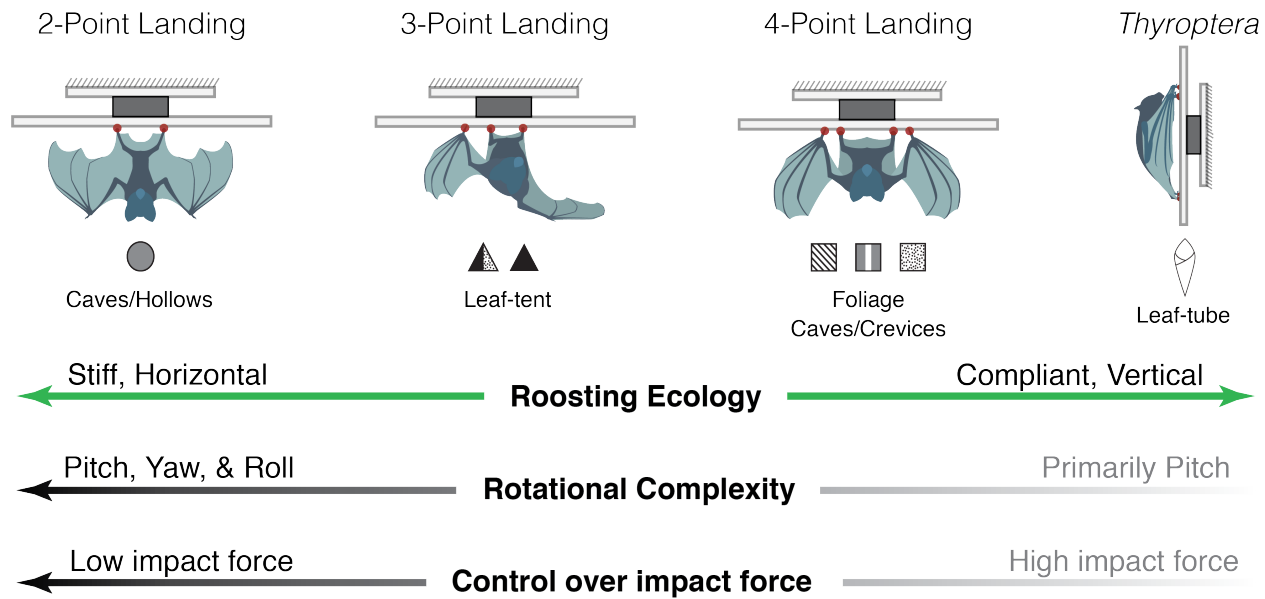

Figure 3. Continuum of landing style, roosting ecology, and landing mechanics. The mechanics of bat landings correspond with patterns of roost use among sampled bats.

294 and Tavares, 2018) and performed two-point landings ( $PP_{\text{two-point}} = 0.978$ ). Thus, this common  
 295 ancestor likely landed with low impact force, using only the two hindlimbs as points of contact.  
 296 Under our hypothesis, the transition to roosting in compliant leaf-tents would have reduced the  
 297 selective pressure on low-impact landings, thus permitting a shift to higher-impact three-point  
 298 landings that retained the feet-first contact order but added the thumb as a stabilizing point of  
 299 contact. In contrast, the common ancestor of the pteropodids (which include *C. brachyotis*)  
 300 performed four-point landings ( $PP_{\text{four-point}} = 0.95$ ), a landing style already amenable to roosting in  
 301 compliant leaf tents which can absorb the high-impact landings.

302

303 *Other factors that may influence landing style*

304 We focused on associations between landing mechanics and roosting ecology in the  
 305 present study, but other traits could also influence diversity of landing maneuvers among bats.  
 306 Here we highlight a couple, including sensory ecology and wing morphology.

307 A bat's ability to sense the location, geometry, and surface characteristics of a potential  
 308 landing site contributes to its capacity to execute accurate, precise landings. Therefore, variation in  
 309 sensory ecology, specifically echolocation capacity and call structure, could also influence the  
 310 landing maneuvers of bats. Most bats navigate their environments and detect prey using laryngeal



311 echolocation, and the structure of these echolocation calls, including amplitude, frequency, and  
312 rate, differs among species and tasks in ways that trade off between target resolution and detection  
313 distance (Geva-Sagiv et al., 2015; Schnitzler et al., 2003). Pteropodids are a notable exception,  
314 however, and rely either on vision or rudimentary forms of echolocation such as tongue or wing  
315 clicks (Boonman et al., 2014; Jones and Teeling, 2006; Kulzer, 1956; Teeling, 2009). Most studies  
316 of echolocation have focused on its role in prey capture or navigation through the environment  
317 during forward flight. Little work to date has investigated echolocation behavior when  
318 approaching stationary targets, such as roosts (but see (Tian and Schnitzler, 1997)) Interspecific  
319 variation in echolocation behavior during landing could reveal patterns that coincide with  
320 differences in impact forces and body rotations as bats call to sense the roost during approach.  
321 Additionally, in the Pteropodidae, which do not possess laryngeal echolocation, landing behavior  
322 could be constrained due to sensory limitations in their capacity to resolve details of potential  
323 roosts with high temporal resolution during an approach flight.

324 Interspecific differences in wing morphology may also relate to variation in landing  
325 mechanics. Because aerodynamic forces are highly dependent upon the velocity of airflow over the  
326 wings, and landing occurs at low speeds, bats accomplish landing maneuvers using inertial forces  
327 almost exclusively (Bergou et al., 2015). The wing's capacity to effect body rotation via inertial  
328 torques is therefore related to their mass moment of inertia, which in turn is determined by the  
329 distribution of mass within the wings. Studies that characterize interspecific differences in wing  
330 mass distribution may therefore reveal a relationship between the wing's body mass-normalized  
331 mass moment of inertia and the rotational complexity of landing maneuvers. For example,  
332 variation in wing inertia could arise from interspecific differences in wing length or relative mass  
333 of the bones, muscle and skin that comprise the wing, particularly in the distal regions.

334  
335 *Estimated ancestral landing mechanics provide support for a gliding bat ancestor*

336 In bats, a group for which origins of powered flight in remain unresolved, studying the  
337 evolutionary history of landing mechanics provides a complementary perspective to studying the  
338 evolution of flight itself. Despite a lack of fossil bat ancestors, most paleontological and  
339 biomechanical investigations point to a gliding origin of bat flight. The hypothesized early bat  
340 ancestor was likely arboreal, possessed gliding membranes made of skin, and is hypothesized to

341 have performed gliding locomotion similar to that observed in extant mammalian gliders (Bishop,  
342 2008; Curet et al., 2012; Gunnell and Simmons, 2012; Simmons et al., 2008).

343         If bat flight has its origins in gliding locomotion, then we would expect that ancestral bats  
344 might have landed similarly to extant gliding mammals. Mammalian gliders execute landings that  
345 rely almost exclusively on pitching rotations and result in high-impact forces (Bahlman et al., 2012;  
346 Bishop, 2007, 2006; Byrnes et al., 2008; Paskins et al., 2007). The four-point landings observed in  
347 extant bats are a plausible next step for landing maneuvers because they would require only  
348 addition of further pitching to the basic glider landing pattern to facilitate landing on the  
349 underside of roosts instead of on the vertical side of tree trunks. Indeed, stochastic character  
350 mapping provides evidence that the common ancestor of bats performed a four-point landing  
351 maneuver, which relies chiefly on pitching rotations with negligible contributions from yaw and  
352 roll, and is characterized by high peak impact forces (Riskin et al., 2009). Our biomechanical study  
353 of landing therefore provides additional support for the gliding origin of flight in bats.

354  
355 *Broader implications: bat conservation and adaptive radiation*

356         Like most of the earth's biodiversity, bats are vulnerable to human disturbance, whether it  
357 be through anthropogenic climate change or more proximate issues, such as deforestation, both of  
358 which affect the availability and quality of roosts. If landing mechanics are associated with roosting  
359 habits then they may affect the extent to which certain species are robust to displacement via roost  
360 destruction. Bats with highly specialized roosting ecologies are generally at higher risk for  
361 extinction and are less prevalent in disturbed forest fragments (Herrera et al., 2018; Sagot and  
362 Chaverri, 2015). In addition to the difficulties associated with locating suitable alternatives, species  
363 with specialized landing maneuvers, such as *Thyroptera tricolor* (Boerma et al., 2019), may also  
364 encounter a biomechanical barrier to establishing new roosts. In certain cases, the mechanics of  
365 bat landing maneuvers may thus mediate roost access by prohibiting certain species from  
366 successfully landing on new surfaces if displaced. Conversely, species whose landing styles are more  
367 flexible and permissive, or those which are able to perform multiple landing styles, such as *A.*  
368 *jamaicensis* and *M. schreibersii*, may be able to roost more easily on a diverse array of surfaces and  
369 thus might be more robust to habitat destruction and deforestation due to anthropogenic  
370 intervention and climate change. Analyses that probe the relationship between number of roost

371 types used, landing style, and habitat range are among the future efforts that could help evaluate  
372 this hypothesis.

373         Additionally, studies that integrate biomechanics with ecology and evolutionary history  
374 have the potential to reveal key morphological or behavioral innovations that changed the way  
375 lineages interacted with their environments and helped to drive adaptive radiations (Burruss et al.,  
376 2020; Burruss and Wainwright, 2019; Muñoz, 2019; Muñoz et al., 2018; Muñoz and Price, 2019;  
377 Stroud and Losos, 2016). Here, we suggest that roosting ecology and landing mechanics are  
378 functionally linked, and given the broad biological importance of roosting for bat diversity, the  
379 potential for landing mechanics to be a mediating factor during the evolution of diverse roosting  
380 habits makes this a promising system for studying how ecological opportunity (roosting ecology),  
381 form (wing morphology), and function (landing mechanics) interacted over the course of  
382 diversification in bats. The extent to which these factors acted as drivers of speciation in certain  
383 lineages is unclear, but the present study serves as a foundation for future inquiry these  
384 evolutionary relationships.

385         Such future work would benefit first and foremost from increased sampling, both in terms  
386 of phylogenetic breadth and in the number of individuals per species. Sampling bats from the  
387 twelve families absent from our sample and pursuing additional sampling in those we included,  
388 especially bats with larger body size (>200 g) or specialized roosting ecologies, would strengthen  
389 inferences about the evolutionary history of landing mechanics and better resolve correlations  
390 between landing style and roosting ecology. Sampling more individuals per species would also  
391 provide a better understanding of the levels of intraspecific variation in impact force, landing style,  
392 and landing kinematics. However, we acknowledge that the difficulties of field-based biomechanics  
393 research may pose challenges for observing landing behavior in a wider array of species.  
394 Approaches that eliminate the measurement of impact forces will allow for broader sampling with  
395 videography because some species are difficult or impossible to train to land on a small force  
396 platform. Furthermore, recording landing videos at known roost locations rather than with  
397 captured individuals in a field-based flight arena might also permit broader sample while  
398 simultaneously documenting variations in landing style on natural roosts.

399         In addition to increased sampling, future work would also benefit from efforts to measure  
400 and reconstruct the evolutionary history of morphological traits related to landing maneuvers,

401 such as wing mass distribution, which determines the inertial torques bats use to execute landings  
402 (Bergou et al., 2015), and other skeletal features relating to limb stresses and landing impact forces.  
403 Taken together, these efforts would determine whether there are clade-based links among roosting  
404 habits, landing style, wing morphology, and diversification rates. If shifts in roosting ecology were  
405 associated with speciation in certain lineages (e.g., stenodermatines), and if roosting ecology,  
406 landing style, and wing morphology were linked, then one should detect significant shifts in  
407 diversification rates for clades that arise following coordinated shifts in roosting habits and landing  
408 style.

409

## 410 **Conclusions**

411         Resolving the connections among form (morphology), function (mechanics), and  
412 environmental context (ecology) are central to understanding the evolutionary history of  
413 organisms. While form-function (functional morphology) and form-environment (ecomorphology)  
414 relationships are often the focus of evolutionary studies, determining linkages between mechanics  
415 and ecology are equally critical to understanding how morphological and ecological variation  
416 interact with the organismal performance on which selection acts. We have presented the first  
417 evolutionary analysis of any aspect of flight dynamics in bats that links specific traits associated  
418 with flight performance to a particular aspect of bat ecology. Our survey of landing mechanics  
419 across a broad sample of bats revealed that interspecific variation in landing styles varies along a  
420 mechanical continuum of rotational complexity and landing impact force, and that the physical  
421 properties of bat roosts are associated with particular landing styles. Independent of phylogenetic  
422 relationships, rotationally complex, low-impact landings (two-point) were positively associated with  
423 stiff, horizontal roosts, whereas rotationally simple, higher-impact landings (three- or four-point)  
424 were negatively associated with stiff roosts, and in some cases were positively associated with  
425 roosting in compliant foliage or spatially constrained roosts in vegetation. These results highlight  
426 the evolutionary interactions between locomotor mechanics and ecology, establish functional links  
427 between landing mechanics and roosting ecology in bats, and suggest that these interactions may  
428 be a factor both for mediating roost use and for driving diversification in certain clades. By  
429 connecting roosting ecology to the biomechanics of landing, we now have the potential to identify  
430 traits that are specifically associated with a particular form of locomotor behavior of known

431 ecological relevance. This accomplishment lays the foundation for a broader understand of the  
432 evolution of flight and wing architecture in this extraordinarily successful lineage of mammals. To  
433 this end, future work should examine additional ecological and morphological correlates and  
434 incorporate evolutionary rate analyses to better resolve how landing mechanics and roosting  
435 ecology, and other traits interacted throughout bat evolution.

436

## 437 **Materials and Methods**

### 438 *Focal taxa, field sites, and animal capture*

439 We recorded 665 landings from 96 bats, representing 35 species, and 9 families (table 1).  
440 We collected all measurements from wild-caught bats except for *Rousettus aegyptiacus* and taxa from  
441 Riskin et al. (2009) (*C. perspicillata*, *G. soricina*, and *C. brachyotis*), which were captive-bred. Our  
442 field sites were located in Lamanai, Orange Walk, Belize (Lamanai Outpost Lodge); Barú,  
443 Puntarenas, Costa Rica (Hacienda Barú Biological Research Station); Tabachka, Bulgaria (Siemers  
444 Bat Research Station, Max Planck Institute); and Shandong, China (Shandong University). We  
445 captured bats using mist-netting, hand-netting, and harp traps.

446

### 447 *Landing experiments*

448 At each field site, we observed bat landings within a temporary flight corridor (3 x 1.5 x 2  
449 m) (length x width x height). For all bats except *T. tricolor* (see Boerma et al. 2019), we covered the  
450 walls and ceiling with smooth plastic sheeting to prevent bats from landing anywhere but on a  
451 ceiling-mounted landing platform, which was covered with stiff plastic mesh that provided a  
452 favorable attachment surface for landing bats. We trained wild-caught bats to land on the platform  
453 by positively reinforcing successful landings with food rewards (fruit and juice for frugivorous bats,  
454 mealworms for insectivorous bats, and water for all bats), and recorded their landing maneuvers  
455 with a synchronized array of three high speed video cameras (Phantom Miro M340, Vision  
456 Research, Wayne, NJ, USA; 800 frames per second, 1000  $\mu$ s exposure; Lenses: Sigma DC 17-  
457 50mm 1:28 EX HSM, SIGMA Corporation, Ronkonkoma, NY, USA) and three LED lights  
458 (Veritas Constellation 120, Integrated Design Tools, Pasadena, CA, USA).

459 Sample sizes for number of species, number of individuals per species, and number of  
460 landings per individual were subject to species availability at field sites and the extent to which

461 wild-caught individuals were amenable to training. Previous studies documented extremely low,  
462 and in some cases nonexistent, intraspecific variation in landing style (Boerma et al., 2019; Riskin  
463 et al., 2009). We therefore accepted samples of one individual per species, but required at least two  
464 landings per individual. We trained a subset of 65 individuals (18 species) to land on a ceiling-  
465 mounted force plate (ATI nano17, ATI Industrial Automation, Apex, NC, USA fitted with  
466 custom acrylic mounting and landing plates). We used a custom MATLAB script to sample impact  
467 forces at 1000 Hz, and to synchronize data collection between the force transducer and the high  
468 speed cameras using a post-trigger initiated at the end of a landing event.

469

#### 470 *Ceiling reaction forces*

471 We filtered the force profiles using a zero-phase 2<sup>nd</sup> order low-pass Butterworth filter with a  
472 cutoff frequency of 100 Hz, which attenuates high-frequency oscillations and electrical noise while  
473 preserving the primary peaks associated with landing impact. Although filtering diminishes the  
474 absolute magnitude peak forces, accurate comparisons among individuals for all force components  
475 are preserved as long as they have been filtered using the same parameters (Boerma et al., 2019;  
476 Riskin et al., 2009). Our filtering parameters match those used by previous investigations of bat  
477 landing impact forces (Riskin et al., 2009 and Boerma et al., 2019). We normalized landing impact  
478 forces to each individual's bodyweight (BW), calculated from the difference between an unloaded  
479 plate just prior to landing and the bat's hanging weight once landed (mass also verified prior to  
480 data collection using a Pesola scale), then extracted peak 3D impact force into the plate for each  
481 landing. We averaged peak impact forces for each individual prior to statistical tests.

482

#### 483 *Definitions of categorical variables: landing style and roosting ecology*

484 We used high speed videography to categorize bat landings according to the convention  
485 established in Riskin et al. 2009, which names landing styles according to the number of limbs  
486 that make initial contact at landing impact with the roost. Landing styles include two-point  
487 landings (both hind limbs), three-point landings (both hind limbs plus one thumb claw), and four-  
488 point landings (both thumb claws plus both hind limbs) (figure1, landing style insets,  
489 Supplemental Videos 1 - 5).

490 We classified the roosting habits of each species according to published observations (table  
491 1), using categories for roosting guilds outlined in Voss et al. 2016 and Garbino & Tavares 2018,  
492 with modifications. Our roosting categories included: cavity in standing tree (CST), exposed on  
493 standing tree (EST), unmodified foliage (FOLUF), furled leaf-tubed (FOL-TB), foliage modified  
494 into leaf-tents (FOL-LT), termite or ant nests (TAN), rocks and/or caves (R/C), and rock crevices  
495 (CREV).

496

497 *Phylogenetic analyses: Ancestral state reconstruction, phylogenetic ANOVA, and phylogenetic logistic*  
498 *regression*

499 We used a published time-calibrated molecular phylogeny (Shi and Rabosky, 2015), pruned  
500 to our focal taxa, for all phylogenetic analyses (excluding *A. watsoni*, which was not included in the  
501 Shi & Rabosky tree), using the Phytools R-package (Revell, 2018, 2011). We then assigned one  
502 landing style as a discrete character to each taxon according to its most-often observed landing style  
503 (table 1).

504 We conducted an ancestral state reconstruction using stochastic character mapping  
505 (Huelsenbeck et al., 2003), as implemented in the make.simmap function of the R package  
506 phytools, to reconstruct the evolutionary history of landing styles among sampled taxa. We used  
507 the fitDiscrete function in the R package Geiger (Harmon et al., 2007) to compare the fit of four  
508 different models for the transition matrix of the stochastic character mapping procedure: equal  
509 rates, symmetric, all rates different, and meristic. The equal rates model yielded the lowest AICc  
510 score, thus we selected this model, which gave all state changes equal probability, and computed  
511 the posterior probability for each landing style at internal nodes from 1000 simulated stochastic  
512 maps.

513 Next, we used phylogenetic generalized least squares regression (PGLS), implemented in  
514 the R function pgl from the package Caper (Orme, 2018) to explore the extent to which landing  
515 impact force is predicted by points of contact. Here, we estimated phylogenetic signal using the  
516 maximum likelihood value of Pagel's lambda and treated points of contact and peak 3D landing  
517 impact force as continuous variables. We log-transformed impact forces to ensure normality. We  
518 then computed a phylogenetic ANOVA (10000 iterations) with post-hoc tests using the  
519 phylANOVA function in the R package phytools to test for pairwise differences in log-peak

520 landing impact forces among landing styles. Peak impact force was the response variable and  
521 landing style was the factor. We omitted two species from these analyses due to an inability to  
522 unambiguously designate them as a two-, three-, or four-point landing: *M. schreibersii* due to its high  
523 degree of behavioral variability and *T. tricolor* because it performs a specialized landing maneuver to  
524 alight on a vertical substrate (Boerma et al., 2019), rather than beneath a horizontal roost as in the  
525 landing experiments for our other sampled taxa.

526 We used phylogenetic logistic regression with Firth's correction (Ives and Garland, 2009),  
527 as implemented in the R package, *phylolm* (Ho and Ané, 2014), to test the hypothesis that landing  
528 styles are associated with the physical properties of roosts. We applied 2000 bootstrap replicates to  
529 generate confidence intervals for and test the significance of the model coefficients,  $\beta$ , which relate  
530 to the probability of observing a particular landing style (categorical response variable) given a  
531 particular roosting ecology (categorical predictor variables). Positive coefficients indicate a positive  
532 association between predictor and response variables, whereas negative coefficients denote a  
533 negative relationship. We excluded *T. tricolor* from this analysis because it is the only sampled  
534 taxon to perform its landing maneuver and to roost in tubular furled leaves. We compared two  
535 models of roosting habits, the latter of which aggregated multiple roost types according to their  
536 physical properties, thereby testing our hypothesis that diverse roost types that share physical  
537 properties are correlate with landing style. The models were as follows: 1) a null model in which we  
538 assigned each taxon's roosting ecology according to its most-commonly cited roost type (table 1),  
539 and 2) an alternate model in which we aggregated roosting ecologies that include stiff, primarily  
540 horizontal surfaces (CST, EST, and R/C) into a single category, spatially-constrained, horizontal  
541 roosts in vegetation (FOL-LT and TAN) into a second category, compliant horizontal roosts (FOL-  
542 UF), and crevices (CREV). We compared the explanatory power of each model using Akaike's  
543 information criterion (AIC).

544

#### 545 **Acknowledgements**

546 The authors are grateful for Nancy Simmons, Brock Fenton, Gloriana Chaverri, Rolf Mueller,  
547 Holger Goerlitz, Stephan Greif, José Pablo Barrantes, Antonia Hubacheva, Theresa Hügel, and  
548 those who attended the annual Belize Batathons for coordinating access to international field sites  
549 and assisting in bat capture and experiments. We thank the Max Planck Institute for Ornithology,



550 the Shandong University-Virginia Tech International Laboratory, the Lamanai Outpost Lodge,  
551 and the Hacienda Barú Biological Research Station for facilitating our field work. We thank  
552 Kenny Breuer and Tom Roberts for providing force transducers, invaluable electronics guidance,  
553 and assistance with experiments in the field. We also thank Cosima Schunk, Jorn Cheney, Jeremy  
554 Rehm, Andrea Rummel, Lawrence Wang, and Erika Tavares for assistance with experiments and  
555 animal husbandry.

556

### 557 **Competing Interests**

558 The authors declare no competing or financial interests.

559

### 560 **Funding**

561 Sigma Xi Grants in Aid of Research (GIAR) - DBB

562 SICB Fellowship for Graduate Student Travel (FGST) - DBB

563 Bushnell Research and Education Fund - DBB

564

### 565 **List of Supplemental Files and Source Data Files**

- 566 • Figure 1–Source Data 1: This .csv file contains the raw peak impact force data, in units of  
567 bodyweight, for each recorded landing. Impact forces were recorded at 1000 Hz,  
568 normalized to the individual’s body mass, and smoothed using a zero-phase 2<sup>nd</sup> order low-  
569 pass Butterworth filter with a cutoff frequency of 100 Hz, parameters which are identical to  
570 those of previous bat landing studies. The total (resultant) force into the ceiling was  
571 calculated and the peak extracted for each landing.
- 572 • Figure 1–Source Data 2: This .csv file contains the mean peak impact forces for each  
573 individual. These values were used to generate Figure 1.
- 574 • Figure 1–Source Data 3:
- 575 • Figure 2–Source Data 1: This .tree file is the phylogeny from Shi and Rabosky (2015) used  
576 for all phylogenetic analyses in this study. The tree was trimmed to include only our focal  
577 species prior to any analyses.
- 578 • Figure 2–Source Data 2: This .csv file contains the source data for the stochastic character  
579 mapping and ancestra state reconstruction for landing style.
- 580 • Table 2–Source Data 1: This .csv file contains the source data for the phylogenetic logistic  
581 regression results summarized in Table 2.
- 582 • PGLS phylANOVA–Source Data 1: This .csv file contains the source data (Taxon, Landing  
583 Style, and mean peak impact force) for the phylogenetic generalized least squares regression  
584 and phylogenetic ANOVA with pairwise comparisons. This data file omits *Thyroptera*  
585 *tricolor* from both analyses because it is the only species to perform its specialized four-point  
586 landing and to roost in furled leaf tubes. It also omits *Miniopterus schreibersii* because its

- 587 landing style was equivocal. See Supplemental File 3 for a version that includes *Thyroptera*  
588 *tricolor*.
- 589 • Supplemental File 1: Posterior probabilities for landing style at each node in the phylogeny  
590 shown in Figure 2. Posterior probabilities were estimated using an equal rates model for  
591 1000 simulated stochastic character maps.
  - 592 • Supplemental File 2: Node legend for posterior probabilities in the phylogeny shown in  
593 Figure 2.
  - 594 • Supplemental File 3: This .csv file summarized the landing style and mean peak impact  
595 force for each species for which impacted forces were measured, except *Miniopterus*  
596 *schreibersii*, for which landing style was equivocal. See Table 1, Figure 1, and Source Data  
597 files for Figure 1 for impact forces and landing style in *M. schreibersii*.
  - 598 • Source Code File 1: This .R file contains the code for plotting impact forces shown in  
599 Figure 1.
  - 600 • Source Code File 2: This .R file contains the code for computing the ancestral state  
601 reconstruction for landing style using stochastic character mapping.
  - 602 • Source Code File 3: This .R file contains the code for computing the phylogenetic  
603 generalized least squares and ANOVA that test for associations between landing style and  
604 landing impact force, and the phylogenetic logistic regressions that test for associations  
605 between landing style and roosting ecology.
  - 606 • Supplemental Video 1: Two-point landing – *Rhinolophus ferrumequinum*
  - 607 • Supplemental Video 2: Three-point – *Artibeus jamaicensis*
  - 608 • Supplemental Video 3: Four-point landing – *Sturnira parvidens*
  - 609 • Supplemental Video 4: Specialized four-point landing – *Thyroptera tricolor*
  - 610 • Supplemental Video 5: Four-point landing on cave wall – *Myotis myotis*

611

612

## 613 References

614

- 615 Altringham JD. 2011. Roosting and feeding ecology Bats: From Evolution to Conservation.  
616 Oxford University Press. pp. 137–174. doi:10.1093/acprof:osobl/9780199207114.003.0006
- 617 Amador LI, Arévalo RLM, Almeida FC, Catalano SA, Giannini NP. 2018. Bat Systematics in  
618 the Light of Unconstrained Analyses of a Comprehensive Molecular Supermatrix. *Journal of*  
619 *Mammalian Evolution* 25:1–34. doi:10.1007/s10914-016-9363-8
- 620 Arbour JH, Curtis AA, Santana SE. 2019. Signatures of echolocation and dietary ecology in the  
621 adaptive evolution of skull shape in bats. *Nature Communications* 1–13. doi:10.1038/s41467-  
622 019-09951-y
- 623 Aulagnier S, Mitchell-Jones AJ, Zima J, Haffner P, Moutou F, Chevalier J. 2018. Mammals of  
624 Europe, North Africa and the Middle East, Bloomsbury Wildlife. Bloomsbury Wildlife.

- 625 Bahlman JW, Swartz SM, Riskin DK, Breuer KS. 2012. Glide performance and aerodynamics of  
626 non-equilibrium glides in northern flying squirrels (*Glaucomys sabrinus*). *Journal of The*  
627 *Royal Society Interface* 10:20120794–20120794. doi:10.1098/rsif.2012.0794
- 628 Barbour T. 1932. A peculiar roosting habit of bats. *The Quarterly review of biology* 7:307–312.
- 629 Bergou AJ, Swartz SM, Vejdani H, Riskin DK, Reimnitz L, Taubin G, Breuer KS. 2015. Falling  
630 with style: Bats perform complex aerial rotations by adjusting wing inertia. *PLoS biology*  
631 13:e1002297. doi:10.1371/journal.pbio.1002297
- 632 Bishop KL. 2008. The evolution of flight in bats: narrowing the field of plausible hypotheses.  
633 *The Quarterly review of biology* 83:153–169.
- 634 Bishop KL. 2007. Aerodynamic force generation, performance and control of body orientation  
635 during gliding in sugar gliders (*Petaurus breviceps*). *The Journal of experimental biology*  
636 210:2593–2606. doi:10.1242/jeb.002071
- 637 Bishop KL. 2006. The relationship between 3-D kinematics and gliding performance in the  
638 southern flying squirrel, *Glaucomys volans*. *Journal of Experimental Biology* 209:689–701.  
639 doi:10.1242/jeb.02062
- 640 Boerma DB, Barrantes JP, Chung C, Chaverri G, Swartz SM. 2019. Specialized landing  
641 maneuvers in Spix’s disk-winged bats (*Thyroptera tricolor*) reveal linkage between roosting  
642 ecology and landing biomechanics. *The Journal of experimental biology* 222:jeb204024-9.  
643 doi:10.1242/jeb.204024
- 644 Bogdanowicz W. 1994. *Myotis daubentonii*. *Mammalian Species* 1. doi:10.2307/3504215
- 645 Bonser RHC. 1999. Branching out in locomotion. *Journal of Experimental Biology* 1–5.
- 646 Boonman A, Bumrungsri S, Yovel Y. 2014. Nonecholocating Fruit Bats Produce Biosonar  
647 Clicks with Their Wings. *Current Biology* 24:2962–2967. doi:10.1016/j.cub.2014.10.077
- 648 Brigham RM. 1991. Flexibility in foraging and roosting behaviour by the big brown bat  
649 (*Eptesicus fuscus*). *Canadian Journal of Zoology* 69:117–121. doi:10.1139/z91-017
- 650 Brunet AK, Medellín RA. 2001. The species-area relationship in bat assemblages of tropical  
651 caves. *Journal of Mammalogy* 82:1114–1122. doi:10.1644/1545-  
652 1542(2001)082<1114:tsarib>2.0.co;2
- 653 Burress ED, Martinez CM, Wainwright PC. 2020. Decoupled jaws promote trophic diversity in  
654 cichlid fishes. *Evolution* 74:950–961. doi:10.1111/evo.13971
- 655 Burress ED, Wainwright PC. 2019. Adaptive radiation in labrid fishes: A central role for  
656 functional innovations during 65 My of relentless diversification. *Evolution* 73:346–359.  
657 doi:10.1111/evo.13670

- 658 Byrnes G, Lim NTL, Spence AJ. 2008. Take-off and landing kinetics of a free-ranging gliding  
659 mammal, the Malayan colugo (*Galeopterus variegatus*). *Proceedings of the Royal Society B:*  
660 *Biological Sciences* 275:1007–1013. doi:10.1098/rspb.2007.1684
- 661 Campbell P, Reid NM, Zubaid A, Adnan AM, Kunz TH. 2006. Comparative Roosting Ecology  
662 of *Cynopterus* (Chiroptera: Pteropodidae) Fruit Bats in Peninsular Malaysia. *Biotropica*  
663 38:725–734. doi:10.1111/j.1744-7429.2006.00203.x
- 664 Catto CMC, Racey PA, Stephenson PJ. 1995. Activity patterns of the serotine bat (*Eptesicus*  
665 *serotinus*) at a roost in southern England. *Journal of Zoology* 235:635–644.  
666 doi:10.1111/j.1469-7998.1995.tb01774.x
- 667 Chapman F. 1932. A home-making bat. *Natural History* 555–556.
- 668 Chaverri G, Kunz TH. 2006. Roosting Ecology of the Tent-Roosting Bat *Artibeus watsoni*  
669 (Chiroptera: Phyllostomidae) in Southwestern Costa Rica. *Biotropica* 38:77–84.
- 670 Choe JC, Timm RM. 1985. Roosting site selection by *Artibeus watsoni* (Chiroptera:  
671 Phyllostomidae) on *Anthurium ravenii* (Araceae) in Costa Rica. *Journal of Tropical Ecology*  
672 1:241–247. doi:10.1017/s0266467400000316
- 673 Cloutier D, Thomas DW. 1992. *Carollia perspicillata*. *Mammalian Species* 417:1–9.
- 674 Curet OM, Swartz SM, Breuer KS. 2012. An aeroelastic instability provides a possible basis for  
675 the transition from gliding to flapping flight. *Journal of The Royal Society Interface*  
676 10:20120940–20120940. doi:10.1098/rsif.2012.0940
- 677 Dakin R, Segre PS, Straw AD, Altshuler DL. 2018. Morphology, muscle capacity, skill, and  
678 maneuvering ability in hummingbirds. *Science* 359:653–657. doi:10.1126/science.aao7104
- 679 Demes B, Jungers WL, Gross TS. 1995. Kinetics of leaping primates: influence of substrate  
680 orientation and compliance. *American Journal of Physical Anthropology* 419–429.
- 681 Dumont ER, Davalos LM, Goldberg A, Santana SE, Rex K, Voigt CC. 2012. Morphological  
682 innovation, diversification and invasion of a new adaptive zone. *Proceedings of the Royal*  
683 *Society B: Biological Sciences* 279:1797–1805. doi:10.1098/rspb.2011.2005
- 684 Dumont ER, Samadevam K, Grosse I, Warsi OM, Baird B, Dávalos LM. 2014. Selection for  
685 mechanical advantage underlies multiple cranial optima in new world leaf-nosed bats.  
686 *Evolution* 68:1436–1449. doi:10.1111/evo.12358
- 687 Eliason CM, Straker L, Jung S, Hackett SJ. 2020. Morphological innovation and biomechanical  
688 diversity in plunge-diving birds. *Evolution* 74:1514–1524. doi:10.1111/evo.14024

- 689 Fenton MB, Bernard E, Bouchard S, Hollis L, Johnston DS, Lausen CL, Ratcliffe JM, Riskin  
690 DK, Taylor JR, Zigouris J. 2001. The bat fauna of Lamanai, Belize: Roosts and trophic roles.  
691 *Journal of Tropical Ecology* 17:511–524.
- 692 Fenton MB, Vonhof MJ, Bouchard S, Gill SA, Johnston DS, Reid FA, Riskin DK, Standing KL,  
693 Taylor JR, Wagner R. 2000. Roosts used by *Sturnira lilium* (Chiroptera : Phyllostomidae) in  
694 Belize. *Biotropica* 32:729–733.
- 695 Funakoshi K, Zubaid A. 1997. Behavioural and reproductive ecology of the dog-faced fruit bats,  
696 *Cynopterus brachyotis* and *C. horsfieldi*, in a Malaysian rainforest. *Mammal Study* 22:95–108.  
697 doi:10.3106/mammalstudy.22.95
- 698 Garbino GST, Tavares V da C. 2018. Roosting ecology of Stenodermatinae bats  
699 (Phyllostomidae): evolution of foliage roosting and correlated phenotypes. *Mammal Review*  
700 30:239–15. doi:10.1111/mam.12114
- 701 Geva-Sagiv M, Las L, Yovel Y, Ulanovsky N. 2015. Spatial cognition in bats and rats: from  
702 sensory acquisition to multiscale maps and navigation. *Nature reviews Neuroscience* 16:94–  
703 108. doi:10.1038/nrn3888
- 704 Gunnell GF, Simmons NB. 2012. Evolutionary History of Bats, Cambridge University Press.  
705 Cambridge University Press.
- 706 Harmon LJ, Weir JT, Brock CD, Glor RE, Challenger W. 2007. GEIGER: investigating  
707 evolutionary radiations. *Bioinformatics* 24:129–131. doi:10.1093/bioinformatics/btm538
- 708 Hernández-Meza B, Domínguez-Castellanos Y, Ortega J. 2005. *Myotis keaysi*. *Mammalian*  
709 *Species* 785:1–3. doi:10.1644/785.1
- 710 Herrera JP, Duncan N, Clare E, Fenton MB, Simmons N. 2018. Disassembly of Fragmented Bat  
711 Communities in Orange Walk District, Belize. *Acta Chiropterologica* 20:147–13.  
712 doi:10.3161/15081109acc2018.20.1.011
- 713 Herzig-Straschil B, Robinson GA. 1978. On the ecology of the fruit bat, *Rousettus aegyptiacus*  
714 *leachi* (A. Smith, 1829) in the Tsitsikama Coastal National Park. *Koedoe* 21.  
715 doi:10.4102/koedoe.v21i1.965
- 716 Higham TE, Rogers SM, Langerhans RB, Jamniczky HA, Lauder GV, Stewart WJ, Martin CH,  
717 Reznick DN. 2016. Speciation through the lens of biomechanics: locomotion, prey capture  
718 and reproductive isolation. *Proceedings of the Royal Society B: Biological Sciences*  
719 283:20161294–39. doi:10.1098/rspb.2016.1294
- 720 Ho L si T, Ané C. 2014. A Linear-Time Algorithm for Gaussian and Non-Gaussian Trait  
721 Evolution Models. *Systematic Biology* 63:397–408. doi:10.1093/sysbio/syu005

- 722 Horáček I, Benda P. 2004. *Hypsugo savii* (Bonaparte, 1837) – Alpenfledermaus In: Krapp F,  
723 editor. *Hanbuch Der Säugetiere Europas*. AULA-Verlag. pp. 912–941.
- 724 Huelsenbeck JP, Nielsen R, Bollback JP. 2003. Stochastic Mapping of Morphological  
725 Characters. *Systematic Biology* 52:131–158. doi:10.1080/10635150390192780
- 726 Ives AR, Garland T. 2009. Phylogenetic Logistic Regression for Binary Dependent Variables.  
727 *Systematic Biology* 59:9–26. doi:10.1093/sysbio/syp074
- 728 Jones G, Teeling E. 2006. The evolution of echolocation in bats. *Trends in Ecology & Evolution*  
729 21:149–156. doi:10.1016/j.tree.2006.01.001
- 730 Jr. J.K.J., Smith JD, Genoways HH. 1973. Annotated Checklist of Mammals of the Yucatan  
731 Peninsula, Mexico. I. Chiroptera. *Occasional Papers, Museum of Texas Tech University* 1–  
732 32.
- 733 Kulzer E. 1956. Flughunde erzeugen orientierungslaute durch Zungenschlag.  
734 *Naturwissenschaften* 43:117–118.
- 735 Kunz TH, Fenton MB. 2006. *Bat Ecology*, University of Chicago Press. University of Chicago  
736 Press.
- 737 Kunz TH, Lumsden LF. 2003. Ecology of Cavity and Foliage Roosting Bats In: Kunz TH,  
738 Fenton MB, editors. *Bat Ecology*. pp. 3–89.
- 739 Kwiecinski GG, Griffiths TA. 1999. *Rousettus egyptiacus*. *Mammalian Species* 1.  
740 doi:10.2307/3504411
- 741 Lausen CL, Barclay RMR. 2003. Thermoregulation and roost selection by reproductive female  
742 big brown bats (*Eptesicus fuscus*) roosting in rock crevices. *Journal of Zoology* 260:235–244.  
743 doi:10.1017/s0952836903003686
- 744 Lausen CL, Barclay RMR. 2002. Roosting behaviour and roost selection of female big brown  
745 bats (*Eptesicus fuscus*) roosting in rock crevices in southeastern Alberta. *Canadian Journal of*  
746 *Zoology* 80:1069–1076. doi:10.1139/z02-086
- 747 Moore TY, Cooper KL, Biewener AA, Vasudevan R. 2017. Unpredictability of escape trajectory  
748 explains predator evasion ability and microhabitat preference of desert rodents. *Nature*  
749 *Communications* 8:1–9. doi:10.1038/s41467-017-00373-2
- 750 Muñoz MM. 2019. The Evolutionary Dynamics of Mechanically Complex Systems. *Integrative*  
751 *and Comparative Biology* 59:705–715. doi:10.1093/icb/icz077
- 752 Muñoz MM, Hu Y, Anderson PSL, Patek SN. 2018. Strong biomechanical relationships bias the  
753 tempo and mode of morphological evolution. *eLife* 7:19699. doi:10.7554/elife.37621

- 754 Muñoz MM, Price SA. 2019. The Future is Bright for Evolutionary Morphology and  
755 Biomechanics in the Era of Big Data. *Integrative and Comparative Biology* 59:599–603.  
756 doi:10.1093/icb/icz121
- 757 Niu H, Wang N, Zhao L, Liu J. 2007. Distribution and underground habitats of cave-dwelling  
758 bats in China. *Animal Conservation* 10:470–477. doi:10.1111/j.1469-1795.2007.00136.x
- 759 Nowak RM. 1999. Chiroptera: Bats Walkers Mammals of the World. The Johns Hopkins  
760 University Press.
- 761 Orme D. 2018. The caper package: comparative analysis of phylogenetics and evolution in R.
- 762 Papadatou E, Butlin RK, Altringham JD. 2008. Seasonal Roosting Habits and Population  
763 Structure of the Long-fingered Bat *Myotis capaccinii* in Greece. *Journal of Mammalogy*  
764 89:503–512. doi:10.1644/07-mamm-a-163r1.1
- 765 Paskins KE, Bowyer A, Megill WM, Scheibe JS. 2007. Take-off and landing forces and the  
766 evolution of controlled gliding in northern flying squirrels *Glaucomys sabrinus*. *The Journal*  
767 *of experimental biology* 210:1413–1423. doi:10.1242/jeb.02747
- 768 Reid F. 2009. A Field Guide to the Mammals of Central America and Southeast Mexico, Oxford  
769 University Press. Oxford University Press.
- 770 Revell LJ. 2018. Package ‘phytools’ 1–195.
- 771 Revell LJ. 2011. phytools: an R package for phylogenetic comparative biology (and other  
772 things). *Methods in Ecology and Evolution* 3:217–223. doi:10.1111/j.2041-  
773 210x.2011.00169.x
- 774 Riskin DK, Bahlman JW, Hubel TY, Ratcliffe JM, Kunz TH, Swartz SM. 2009. Bats go head-  
775 under-heels: the biomechanics of landing on a ceiling. *Journal of Experimental Biology*  
776 212:945–953. doi:10.1242/jeb.026161
- 777 Rojas D, Warsi OM, Dávalos LM. 2016. Bats (Chiroptera: Noctilionoidea) Challenge a Recent  
778 Origin of Extant Neotropical Diversity. *Systematic Biology* 65:432–448.  
779 doi:10.1093/sysbio/syw011
- 780 Sagot M, Chaverri G. 2015. Effects of roost specialization on extinction risk in bats.  
781 *Conservation Biology* 29:1666–1673. doi:10.1111/cobi.12546
- 782 Santana SE, Grosse IR, Dumont ER. 2012. Dietary hardness, loading behavior, and the evolution  
783 of skull form in bats. *Evolution* 66:2587–2598. doi:10.1111/j.1558-5646.2012.01615.x
- 784 Schluter D. 2009. Evidence for ecological speciation and its alternative. *Science* 323:737–741.  
785 doi:10.1126/science.1160006

- 786 Schnitzler H-U, Moss CF, Denzinger A. 2003. From spatial orientation to food acquisition in  
787 echolocating bats. *Trends in Ecology & Evolution* 18:386–394. doi:10.1016/s0169-  
788 5347(03)00185-x
- 789 Shi JJ, Rabosky DL. 2015. Speciation dynamics during the global radiation of extant bats.  
790 *Evolution* 69:1528–1545. doi:10.1111/evo.12681
- 791 Simmons NB, Seymour KL, Habersetzer J, Gunnell GF. 2008. Primitive Early Eocene bat from  
792 Wyoming and the evolution of flight and echolocation. *Nature* 451:818–821.  
793 doi:10.1038/nature06549
- 794 Simmons NB, Voss RS. 1998. The mammals of Paracou, French Guiana: A neotropical lowland  
795 rainforest fauna part - 1. Bats. *Bulletin of the American Museum of Natural History* 1–219.
- 796 Stroud JT, Losos JB. 2016. Ecological Opportunity and Adaptive Radiation. *Annual Review of*  
797 *Ecology, Evolution, and Systematics* 47:507–532. doi:10.1146/annurev-ecolsys-121415-  
798 032254
- 799 Tan KH, Zubaid A, Kunz TH. 1997. Tent construction and social organization in *Cynopterus*  
800 *brachyotis* (Muller) (Chiroptera: Pteropodidae) in Peninsular Malaysia. *Journal of Natural*  
801 *History* 31:1605–1621. doi:10.1080/00222939700770861
- 802 Teeling EC. 2009. Hear, hear: the convergent evolution of echolocation in bats? *Trends in*  
803 *Ecology & Evolution* 24:351–354. doi:10.1016/j.tree.2009.02.012
- 804 Thomas DW, Fenton MB. 1978. Notes on the dry season roosting and foraging behaviour of  
805 *Epomophorus gambianus* and *Rousettus aegyptiacus* (Chiroptera :Pteropodidae). *Journal of*  
806 *Zoology* 186:403–406. doi:10.1111/j.1469-7998.1978.tb03929.x
- 807 Tian B, Schnitzler H-U. 1997. Echolocation signals of the Greater Horseshoe bat (*Rhinolophus*  
808 *ferrumequinum*) in transfer flight and during landing. *The Journal of the Acoustical Society of*  
809 *America* 101:2347–2364. doi:10.1121/1.418272
- 810 Timm RM. 1987. Tent Construction by Bats of the Genera *Artibeus* and *Uroderma* In: D PB,  
811 Timm RM, editors. *Studies in Neotropical Mammalogy Essays in Honor of Philip*  
812 *Hershkovitz*. pp. 187–212.
- 813 Timm RM. 1985. *Artibeus phaeotis*. *Mammalian Species* 1–6.
- 814 Voss RS, Fleck DW, Strauss RE, Velazco PM, Simmons NB. 2016. Roosting Ecology of  
815 Amazonian Bats: Evidence for Guild Structure in Hyperdiverse Mammalian Communities.  
816 *American Museum Novitates* 3870:1–43. doi:10.1206/3870.1
- 817 Wainwright PCP, Alfaro MEM, Bolnick DID, Hulsey CDC. 2005. Many-to-One Mapping of  
818 Form to Function: A General Principle in Organismal Design? *Integrative and Comparative*  
819 *Biology* 45:256–262. doi:10.1093/icb/45.2.256



- 820 Wilkinson GS. 1984. Reciprocal food sharing in the vampire bat. *Nature* 308:181–184.
- 821 Wilson DE, Findley JS. 1977. *Thyroptera tricolor*. *Mammalian Species* 71:1–3.
- 822 Zhang L, Jones G, Zhang J, Zhu G, Parsons S, Rossiter SJ, Zhang S. 2009. Recent Surveys of  
823 Bats (Mammalia: Chiroptera) from China. I. Rhinolophidae and Hipposideridae. *Acta*  
824 *Chiropterologica* 11:71–88. doi:10.3161/150811009x465703
- 825
